# Supplementary figures and images for: Do-It-Yourself Open Artificial Pancreas System in Children and Adolescents with Type 1 Diabetes Mellitus: Real-World Data
Source: PubMed Central journal article supplement — Diabetes Metab J. 2021 Nov 23;46(1):154–9. doi: 10.4093/dmj.2021.0011 (PMC8831819; doi:10.4093/dmj.2021.0011), 2021-11-23

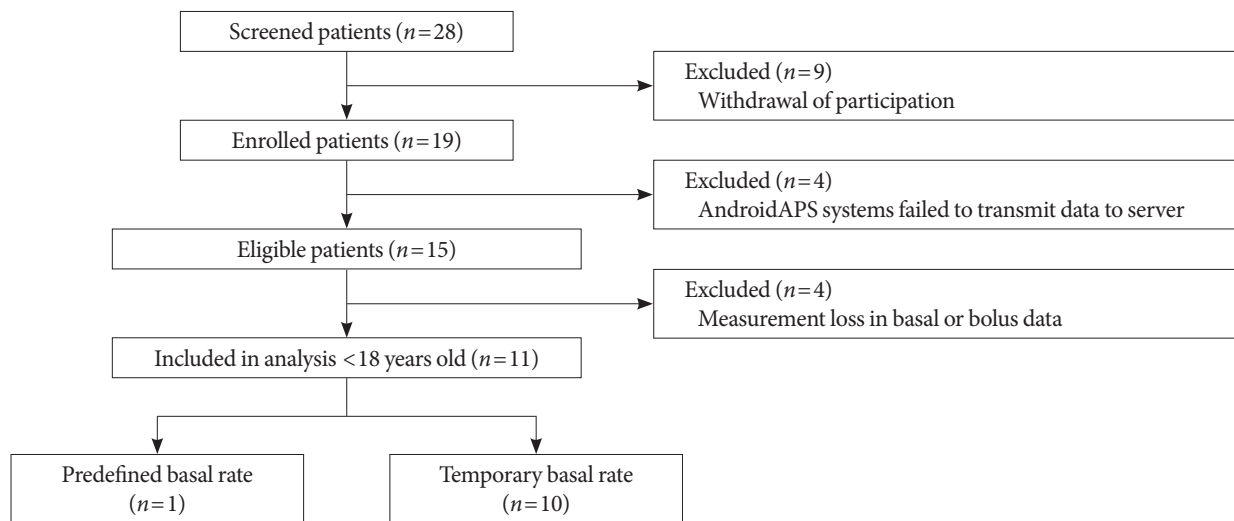

**Supplementary Fig. 1.** Patient disposition. APS, artificial pancreas system.

Supplement: dmj-2021-0011-suppl1.pdf [file dmj-2021-0011-suppl1.pdf]
